# Supplementary material
Source: publisher figshare collection journal article supplement (https://gsapubs.figshare.com/ndownloader/files/23300339)
Supplement: Supplementary file 1 [file 23300339]

## Sheet: Table DR1
Table DR1. Re-Os isotopes, Platinum Group Elements and major and trace element compositions of troctolites and harzburgites from Central Indian Ridge.
Rock		Harzburgite	Harzburgite	Harzburgite	Harzburgite		Ol-troctolite		Ol-troctolite	Troctolite	Troctolite		Troctolite	Cpx-troctolite	Troctolite	Troctolite
Sample		1170R01	1170R20	1170R25	1176R09		925R03		925R04	925R06	925R09		925R10	925R12	922R05	922R07
						dup.		dup.				dup.
Olivine Fo (mol%)		91.3	91.01	91.1	90.8		89.335		89.4	88.04	88.4		87.5	87.84	89.26	88.75
ds		0.1	0.1	0.1	0.1		0.105551		0.25	0.49	0.21		0.11	0.21	0.11	0.23
Olivine NiO (wt%)		0.38	0.37	0.37	0.38		0.28		0.29	0.25	0.24		0.23	0.23	0.27	0.26
ds		0.01	0.02	0.01	0.02		0.0244949		0.02	0.04	0.01		0.02	0.02	0.02	0.03
Os (pg/g)		4036.39	2821.2	3849.15	2457.06	2088.23	376.472	382.908	353.357	51.4399	63.2955	84.4728	15.894	36.0537	128.42	131.087
Os (% b.c.)		0.0161947	0.0218784	0.016659	0.0234431	0.032413	0.180032	0.298456	0.192388	0.11405	0.366837	0.698701	4.15092	1.87479	0.516403	0.514351
Re (pg/g)		117.403	-	125.753	66.5036	62.8442	260.858	266.26	206.952	274.199	90.1748	94.4604	46.2129	333.601	342.686	364.282
Re (% b.c.)		0.268628		0.24866	0.42167	0.523856	0.127066	0.248999	0.160613	1.22988	1.06176	1.33809	0.722765	0.100827	0.0961098	0.0908548
187Os/188Os		0.124227	0.127329	0.128358	0.126221	0.127486	0.130767	0.129753	0.130403	0.132163	0.13401	0.133285	0.14052	0.132584	0.130517	0.134496
2s		0.000136268	0.000301072	0.000242053	0.000169953	0.000380316	0.000503259	0.000663426	0.000134021	0.000268368	0.000240183	0.000609565	0.000473419	0.00235189	0.000267873	0.000702231
187Re/188Os		0.140071	-	0.157417	0.130378	0.144989	3.33972	3.35116	2.82276	25.6984	6.86993	5.39186	14.0343	44.6124	12.8616	13.4009
2s		0.000764504		0.00114104	0.00112329	0.00122181	0.0109464	0.022563	0.010622	0.10557	0.0421101	0.0486094	0.225249	0.511223	0.0354519	0.0506899
Ir (pg/g)		3433.26	2316.49	3703.54	2595.59	2495.87	351.776	298.839	244.385	72.1199	70.8795	70.352	52.3408	-	91.2941	115.979
Ru (pg/g)		7456.19	4985.62	8859.58	6599.88	4807.11	571.883	615.275	470.997	69.5732	76.8478	102.445	46.2454	105.62	202.355	168.291
Pt (pg/g)		6556.14	4267.9	11919.1	4835.91	5050.2	1440.41	493.764	797.823	-	-	68.5121	-	-	-	352.665
Pd (pg/g)		945.7	2867.56	2958.37	1118.52	1548.94	1474.63	1741.47	646.628	159.346	218.924	284.706	217.775	122.561	438.857	618.1
Major Elements (wt%)
SiO2		43.953	44.988	43.637	44.756		41.801		41.815	42.566	42.581		43.92	43.945	43.827	43.188
TiO2		0.02	0.021	0.013	0.017		0.068		0.062	0.059	0.071		0.09	0.131	0.128	0.073
Al2O3		1.109	1.345	1.055	1.036		7.244		8.989	12.356	13.507		20.442	8.763	8.791	13.691
Fe2O3		8.839	9.529	9.896	6.919		9.679		9.402	8.064	7.599		4.579	8.507	8.554	7.14
MnO		0.102	0.105	0.13	0.085		0.13		0.114	0.097	0.087		0.031	0.104	0.103	0.079
MgO		44.32	41.306	41.966	45.078		37.58		33.996	28.904	27.258		18.283	29.099	29.186	25.318
CaO		0.151	0.637	2.225	0.2		2.088		4.529	7.071	7.765		11.519	7.947	7.833	8.615
Na2O		0.072	0.114	0.106	0.113		0.115		0.081	0.247	0.26		0.699	0.368	0.378	0.655
K2O		0.007	0.02	0.009	0.009		0.021		0.013	0.034	0.081		0.101	0.014	0.014	0.025
P2O5		0.022	0.014	0.043	0.029		0.017		0.015	0.015	0.018		0.023	0.02	0.019	0.018
Sum		98.595	98.079	99.08	98.242		98.743		99.016	99.413	99.227		99.687	98.833	98.898	98.802
L.O.I		13.5193	12.4197	14.2857	3.65965		12.0833		10.2204	7.7325	8.83813		6.34249	6.12992	6.10465	8.50202
Trace Elements (ppm)
Sc		8.84	10.8	12	8.79		5.72		4.88	5.05	5.28		4.37	16.9	3.98	7.27
Co		95.5	88.9	107	97.2		95.5		87.8	78.2	69.8		44	84.4	85	69.1
Ni		1773	1580	1869	1885		1477		1188	956	999		566	1009	1216	620
Cu		1.92	12	7.78	12.8		45.7		48.1	39.5	16.7		14	39	39	64
Rb		0.027	0.059	0.453	0.059		0.64		0.438	0.494	0.427		0.455	0.462	0.275	0.776
Sr		2.06	6.53	132	3.35		9.11		6.59	50	53.3		84.7	49.9	7.17	60.5
Y		0.407	0.538	0.635	0.3		1.02		1.14	1.13	1.46		1.84	2.94	0.448	1.75
Zr		0.008	0.115	0.024	0.006		1.5		1.93	1.48	1.8		2.51	4.53	0.607	3.65
Nb		0.00379	0.0145	0.00641	0.00328		0.0196		0.0353	0.0273	0.0447		0.06	0.0505	0.0311	0.0752
Cs		0.00041	0.00211	0.0237	0.00124		0.028		0.0407	0.0266	0.0176		0.0268	0.0376	0.0191	0.0397
Ba		0.575	1.13	2.35	0.254		1.09		0.251	2.02	0.807		1.14	1.39	1.46	0.362
La		0.0148	0.0689	0.0301	0.0286		0.0659		0.0669	0.0829	0.106		0.156	0.155	0.0442	0.189
Ce		0.00451	0.144	0.038	0.049		0.214		0.235	0.273	0.362		0.51	0.548	0.133	0.601
Pr		0.00147	0.0213	0.00888	0.00675		0.0396		0.045	0.0496	0.0676		0.0933	0.106	0.0235	0.102
Nd		0.00788	0.094	0.0458	0.0353		0.232		0.271	0.291	0.4		0.541	0.645	0.133	0.559
Sm		0.00388	0.0271	0.0142	0.00477		0.0884		0.107	0.111	0.151		0.199	0.269	0.0437	0.192
Eu		0.0107	0.0202	0.00574	0.00562		0.0658		0.0713	0.107	0.121		0.156	0.159	0.0634	0.149
Gd		0.0179	0.0453	0.0317	0.0135		0.134		0.161	0.159	0.22		0.289	0.426	0.0611	0.273
Tb		0.00562	0.0104	0.0076	0.00387		0.026		0.0304	0.0297	0.0398		0.0523	0.0809	0.0118	0.0494
Dy		0.0542	0.084	0.0668	0.0362		0.18		0.21	0.202	0.266		0.343	0.553	0.0785	0.332
Ho		0.0158	0.0224	0.0199	0.0112		0.0411		0.0467	0.0453	0.0591		0.0741	0.121	0.0181	0.0717
Er		0.0578	0.0804	0.0755	0.0413		0.1307		0.1423	0.1407	0.1789		0.2171	0.359	0.0583	0.2104
Tm		0.0106	0.0139	0.0132	0.00772		0.0203		0.0213	0.0214	0.0264		0.0309	0.0512	0.0097	0.0307
Yb		0.083	0.108	0.102	0.0621		0.146		0.143	0.152	0.182		0.2	0.34	0.0731	0.203
Lu		0.0148	0.0188	0.0189	0.0111		0.0245		0.0227	0.0251	0.0296		0.0305	0.0525	0.0126	0.0314
Hf		0.00252	0.00399	0.00244	0.00187		0.0519		0.0719	0.0539	0.0681		0.0946	0.158	0.0204	0.111
Th		0.0005	0.00106	0.00629	0.00046		0.00182		0.00221	0.00168	0.00266		0.00394	0.00249	0.00422	0.00115
U		0.775	0.337	0.123	0.671		0.0214		0.00201	0.00287	0.00284		0.0051	0.0027	0.00244	0.0205
Th/U		0.000645161	0.0031454	0.0511382	0.000685544		0.0850467		1.0995	0.585366	0.93662		0.772549	0.922222	1.72951	0.0560976
Notes: Uncertainties are estimated by error propagation of uncertainties in N-TIMS and IPC-QMS measurements (2SE) and blank correction.
Fo, forsterite component in olivine (mol%)
Ol-troctolite (Olivine >70 vol%); Cpx-troctolite (Clinopyroxene > 5 vol%)

## Sheet: Table DR2
Table DR2. Re-Os isotope compositions of ultramafic reference materials (UB-N and JP-1) obtained at 240ºC and 24 hours digestion
	Os (ng/g)		Re (ng/g)		187Re/188Os		187Os/188Os
UB-N (serpentinite, CNRS)
Mean for n=4 (1SD)	4.22	-39	0.216	-28	0.25	-59	0.1277	-112
Meisel et al., 2003 (n=15, 1SD)	3.74	-26	0.206	-5	0.265	-20	0.1278	-2
Becker et al., 2006 (n=4, 1SD)	3.51	-13	0.205	-4	0.282	-14	0.12737	-32
Luguet et al., 2007 (n=6, 1SD)	3.66	-15	0.205	-7	0.27	-14	0.1279	-5
Puchtel et al., 2008 (n=4, 1SD)	3.85	-32	0.213	-11	0.267	-26	0.12722	-38
Kogiso et al., 2008 (n=3, 1SD)	3.56	-9	0.189	-2
Fischer-Gödde et al., 2011 (n=19, 1SD)	3.53	-25	0.188	-24	0.257	-33	0.12722	-27
JP-1 (harzburgite, GSJ)
Mean for n=7 (1SD)	3.03	-60	0.0244	-13	0.04	-105	0.12094	-71
Suzuki and Tatsumi, 2001 (n=2, 1SD)	2.58	-20	0.0299	-26	0.056	-9	0.1206	-4
Shirai et al., 2003 (n=5, 1SD)	4.01	-50
Meisel and Moser 2004 (n=9, 1SD)	3.77	-68	0.066	-23
Shinotsuka and Suzuki, 2007 (n=7, 1SD)	3.43	-53	0.0235	-8	0.033	-5	0.12

## Sheet: Table DR3
Table DR3. Parameters and representative composition of the reacting melt resulted from the reactive crystallization process
		Proportions	Initial melt	1	0.9995	0.999	0.9985	0.998	0.9975	0.997	0.9965	0.996	0.9955	0.995	0.9945	0.994	0.9935	0.993	0.9925	0.992	0.9915	0.991	0.9905	0.99
			Radiogenic sulfides	0	0.0005	0.001	0.0015	0.002	0.0025	0.003	0.0035	0.004	0.0045	0.005	0.0055	0.006	0.0065	0.007	0.0075	0.008	0.0085	0.009	0.0095	0.01
Mean value Central Indian Ridge peridotites (187Os/188Os=0.1265)
Intersititial sulfides assimilation		Initial melt	Radiogenic sulfides
	187Os/188Os ratio	0.1265	0.15	0.1265	0.138253	0.142172	0.144132	0.145308	0.146091	0.146651	0.147072	0.147398	0.14766	0.147873	0.148052	0.148202	0.148332	0.148444	0.148542	0.148628	0.148705	0.148774	0.148836	0.148892
	Os (ppb)	0.5	1000	0.5	0.99975	1.4995	1.99925	2.499	2.99875	3.4985	3.99825	4.498	4.99775	5.4975	5.99725	6.497	6.99675	7.4965	7.99625	8.496	8.99575	9.4955	9.99525	10.495
Magmatic sulfides fractionation
	Sulfides fractionation (F)			-	0.0005	0.001	0.0015	0.002	0.0025	0.003	0.0035	0.004	0.0045	0.005	0.0055	0.006	0.0065	0.007	0.0075	0.008	0.0085	0.009	0.0095	0.01
	Os (ppb) reacting melt			0.5	0.0399908	0.0306027	0.0273875	0.0257634	0.0247836	0.0241281	0.0236588	0.0233062	0.0230316	0.0228117	0.0226316	0.0224814	0.0223543	0.0222453	0.0221507	0.022068	0.021995	0.02193	0.0218719	0.0218196
Lowermost value Central Indian Ridge peridotites (187Os/188Os=0.124)
Intersititial sulfides assimilation		Initial melt	Radiogenic sulfides
	187Os/188Os ratio	0.124	0.15	0.124	0.137003	0.141339	0.143507	0.144808	0.145676	0.146295	0.14676	0.147121	0.147411	0.147647	0.147844	0.148011	0.148154	0.148278	0.148386	0.148482	0.148567	0.148643	0.148712	0.148774
	Os (ppb)	0.5	1000	0.5	0.99975	1.4995	1.99925	2.499	2.99875	3.4985	3.99825	4.498	4.99775	5.4975	5.99725	6.497	6.99675	7.4965	7.99625	8.496	8.99575	9.4955	9.99525	10.495
Magmatic sulfides fractionation
	Sulfides fractionation (F)			-	0.0005	0.001	0.0015	0.002	0.0025	0.003	0.0035	0.004	0.0045	0.005	0.0055	0.006	0.0065	0.007	0.0075	0.008	0.0085	0.009	0.0095	0.01
	Os (ppb) reacting melt			0.5	0.0399908	0.0306027	0.0273875	0.0257634	0.0247836	0.0241281	0.0236588	0.0233062	0.0230316	0.0228117	0.0226316	0.0224814	0.0223543	0.0222453	0.0221507	0.022068	0.021995	0.02193	0.0218719	0.0218196
Uppermost value Central Indian Ridge peridotites (187Os/188Os=0.128)
Intersititial sulfides assimilation		Initial melt	Radiogenic sulfides
	187Os/188Os ratio	0.128	0.15	0.128	0.139003	0.142672	0.144506	0.145607	0.146341	0.146865	0.147258	0.147564	0.147809	0.148009	0.148176	0.148317	0.148438	0.148543	0.148635	0.148716	0.148788	0.148852	0.14891	0.148962
	Os (ppb)	0.5	1000	0.5	0.99975	1.4995	1.99925	2.499	2.99875	3.4985	3.99825	4.498	4.99775	5.4975	5.99725	6.497	6.99675	7.4965	7.99625	8.496	8.99575	9.4955	9.99525	10.495
Magmatic sulfides fractionation
	Sulfides fractionation (F)			-	0.0005	0.001	0.0015	0.002	0.0025	0.003	0.0035	0.004	0.0045	0.005	0.0055	0.006	0.0065	0.007	0.0075	0.008	0.0085	0.009	0.0095	0.01
	Os (ppb) reacting melt			0.5	0.0399908	0.0306027	0.0273875	0.0257634	0.0247836	0.0241281	0.0236588	0.0233062	0.0230316	0.0228117	0.0226316	0.0224814	0.0223543	0.0222453	0.0221507	0.022068	0.021995	0.02193	0.0218719	0.0218196
see equations in supplementary text file.
